# Supplementary material
Source: Springer Nature journal article supplement (https://www.springermedizin.de/resource/supplementary/12881_2009_576_MOESM4_ESM.pdf/9450938)

14bp indel homozygote

348bp WT homozygote

14bp indel heterozygote

14bp indel/C=>G

14bp indel/43bp deletion compound heterozygote

40bp duplication

5bp deletion heterozygote

10bp deletion heterozygote

43bp deletion heterozygote

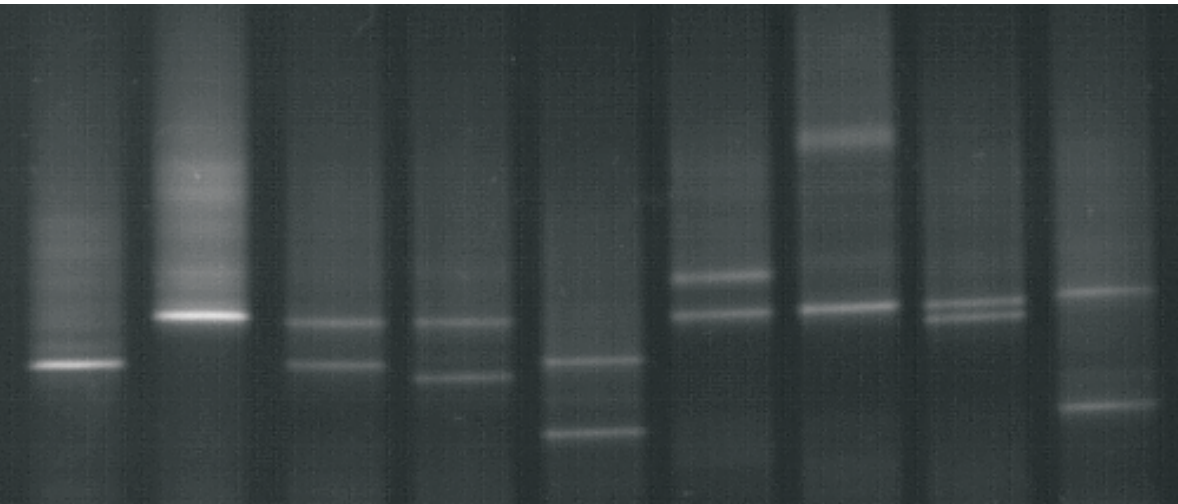

Supplement: MOESM4 [file 9450938]
